# Supplementary material for: Preparation and Characterization of 3D-Printed Biobased Composites Containing Micro- or Nanocrystalline Cellulose
Source: MDPI journal article supplement (doi:10.3390/polym14091886), 2022-05-05
Supplement: s1 [file s1]

Supplementary

# Preparation and Characterization of 3D-Printed Biobased Composites Containing Micro- or Nanocrystalline Cellulose

Raphael Palucci Rosa <sup>1,\*</sup>, Giuseppe Rosace <sup>2</sup>, Rossella Arrigo <sup>3</sup> and Giulio Malucelli <sup>3</sup>

<sup>1</sup> Department of Engineering and Applied Sciences, University of Bergamo, Viale Marconi 5, 24044 Dalmine, Bergamo, Italy

<sup>2</sup> Department of Engineering and Applied Sciences, University of Bergamo, Local INSTM Unit, Viale Marconi 5, 24044 Dalmine, Bergamo, Italy; giuseppe.rosace@unibg.it

<sup>3</sup> Department of Applied Science and Technology, Politecnico di Torino, Local INSTM Unit, Viale T. Michel 5, 15121 Alessandria, Italy; rossella.arrigo@polito.it (R.A.); giulio.malucelli@polito.it (G.M.)

\* Correspondence: raphael.rosa@unibg.it

## 1. FT-IR analysis

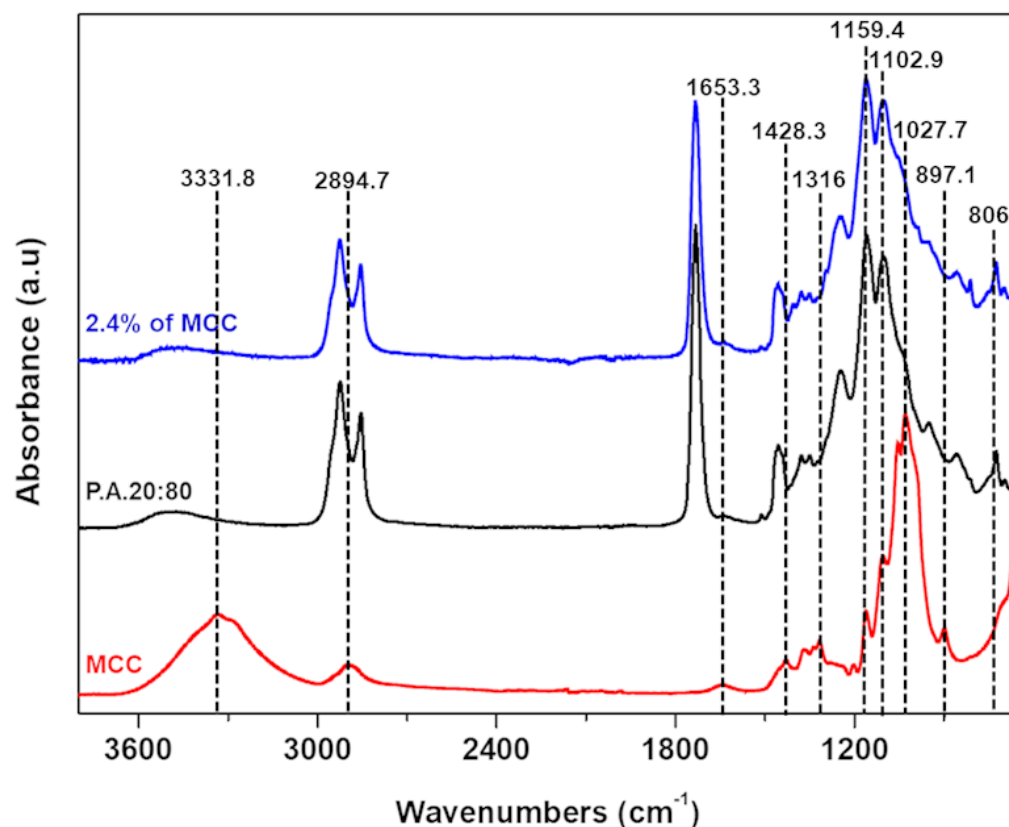

Figure S1: FT-IR spectra of MCC, P.A.20:80, and P.A.20:80 containing 2.4 wt.% of MCC.

**Citation:** Palucci Rosa, R.; Rosace, G.; Arrigo, R.; Malucelli, G. Preparation and Characterization of 3D-Printed Biobased Composites Containing Micro- or Nanocrystalline Cellulose. *Polymers* **2022**, *14*, 1886. <https://doi.org/10.3390/polym14091886>

Academic Editor: Andrea Ehrmann

Received: 20 April 2022

Accepted: 1 May 2022

Published: 5 May 2022

**Publisher's Note:** MDPI stays neutral with regard to jurisdictional claims in published maps and institutional affiliations.

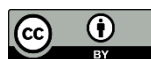

**Copyright:** © 2022 by the authors. Submitted for possible open access publication under the terms and conditions of the Creative Commons Attribution (CC BY) license (<https://creativecommons.org/licenses/by/4.0/>).

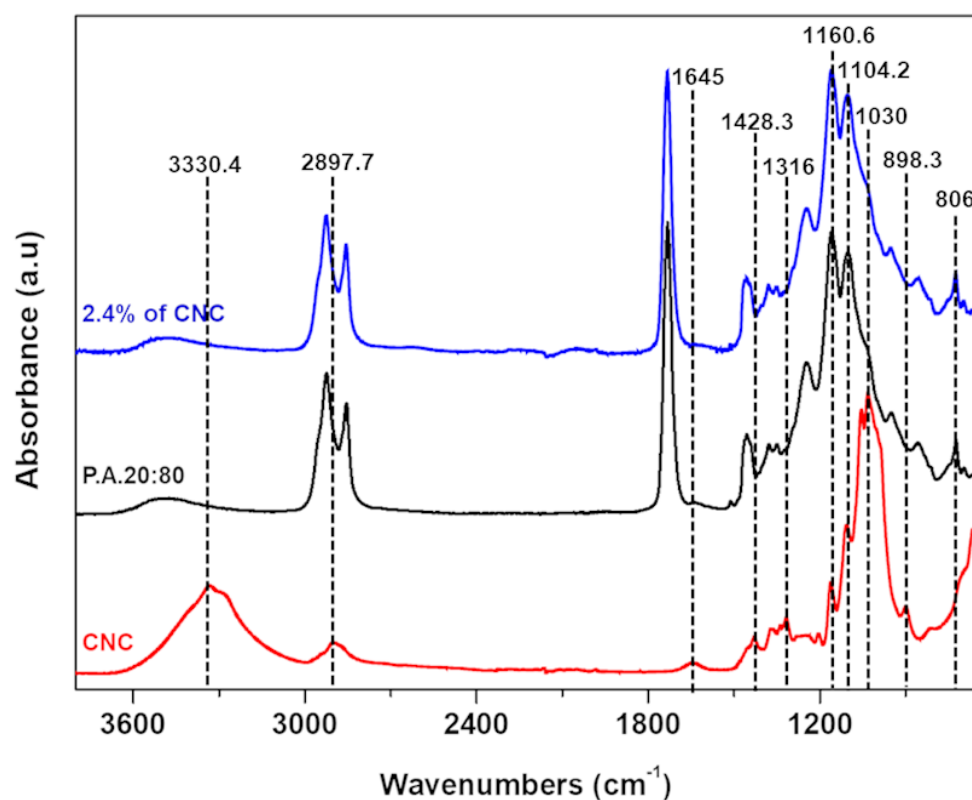

Figure S2: FT-IR spectra of CNC, P.A.20:80, and P.A.20:80 containing 2.4 wt.% of CNC.

## 2. Swelling properties

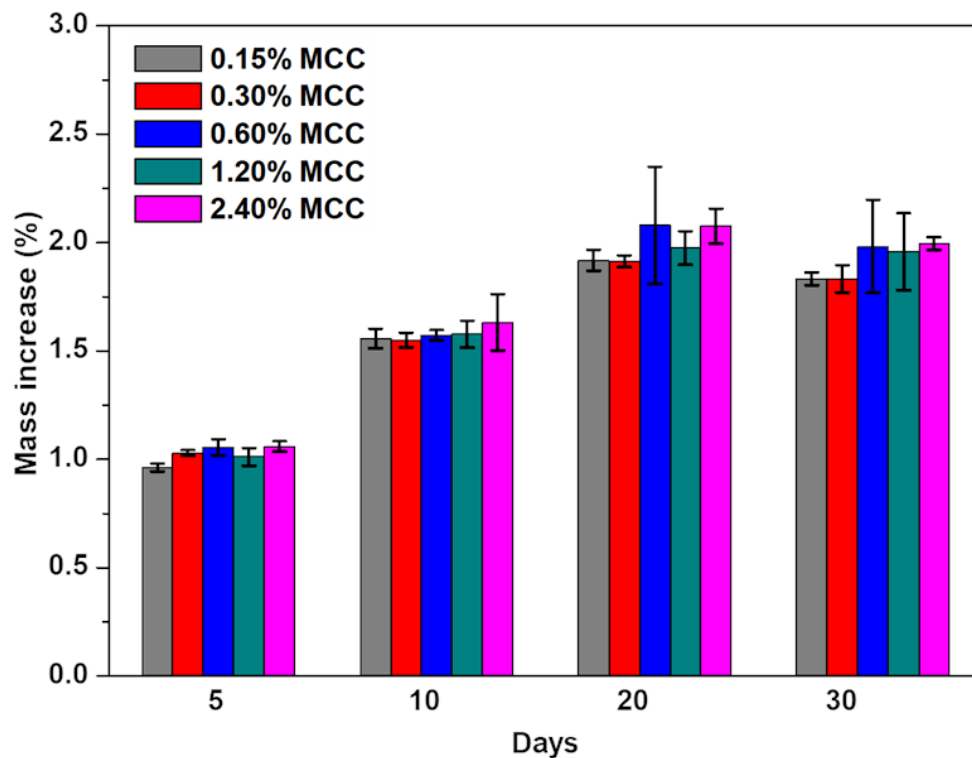

Figure S3: Influence of different MCC mass percentages on the P.A.20:80 swelling after 5, 10, 20 and 30 days.

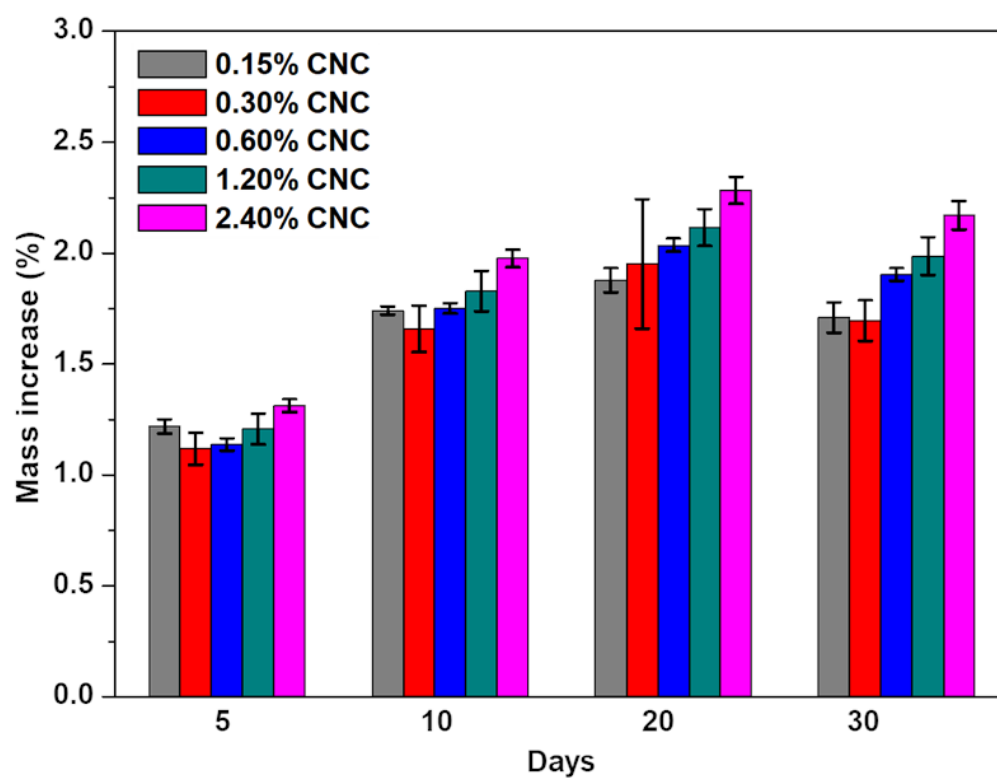

**Figure S4.** Influence of different CNC mass percentages on the P.A.20:80 swelling after 5, 10, 20 and 30 days.

### 3. Contact angle measurement

**Table S1:** Contact angle measurements of 3D-printed samples with different AESO loadings.

| Sample code | Contact angle (°) | Standard deviation |
|-------------|-------------------|--------------------|
| PEGDA       | 72.1              | 3.8                |
| P.A.50:50   | 76.8              | 2.7                |
| P.A.40:60   | 78.5              | 0.8                |
| P.A.30:70   | 88.6              | 0.9                |
| P.A.20:80   | 93.0              | 2.3                |
| AESO        | 92.0              | 1.6                |
